# Supplementary material
Source: PubMed Central journal article supplement (PMC3478423)
Supplement: NIHMS391335-supplement-01.pdf [file NIHMS391335-supplement-01.pdf]

**Prescribed medications used in eMERGE T2DM algorithm**

|                    | <b>Brand name</b> | <b>Generic name</b> |
|--------------------|-------------------|---------------------|
| T2DM<br>Medication |                   | acetoexamide        |
|                    |                   | tolazamide          |
|                    | Diabinese         | chlorpropamide      |
|                    | Glucotrol         | glipizide           |
|                    | Glucotrol XL      | glipizide           |
|                    | Micronase         | glyburide           |
|                    | Glynase           | glyburide           |
|                    | Diabeta           | glyburide           |
|                    | Amaryl            | glimepiride         |
|                    | Prandin           | repaglinide         |
|                    | Starlix           | nateglinide         |
|                    | Glucophage        | metformin           |
|                    | Avandia           | rosiglitazone       |
|                    | ACTOS             | pioglitazone        |
|                    |                   | troglitazone        |
|                    | Precose           | acarbose            |
|                    | Glyset            | miglitol            |
|                    | Januvia           | sitagliptin         |
| Byetta             | exenatide         |                     |
| T1DM<br>Medication | Insulin           | Insulin             |
|                    | Symlin            | Pramlintide         |
